# Supplementary material for: Contactin-1 Is Reduced in Cerebrospinal Fluid of Parkinson’s Disease Patients and Is Present within Lewy Bodies
Source: Biomolecules. 2020 Aug 12;10(8):1177. doi: 10.3390/biom10081177 (PMC7463939; doi:10.3390/biom10081177)
Supplement: Supplementary file 1 [file biomolecules-10-01177-s001.pdf]

## Supplementary Figures

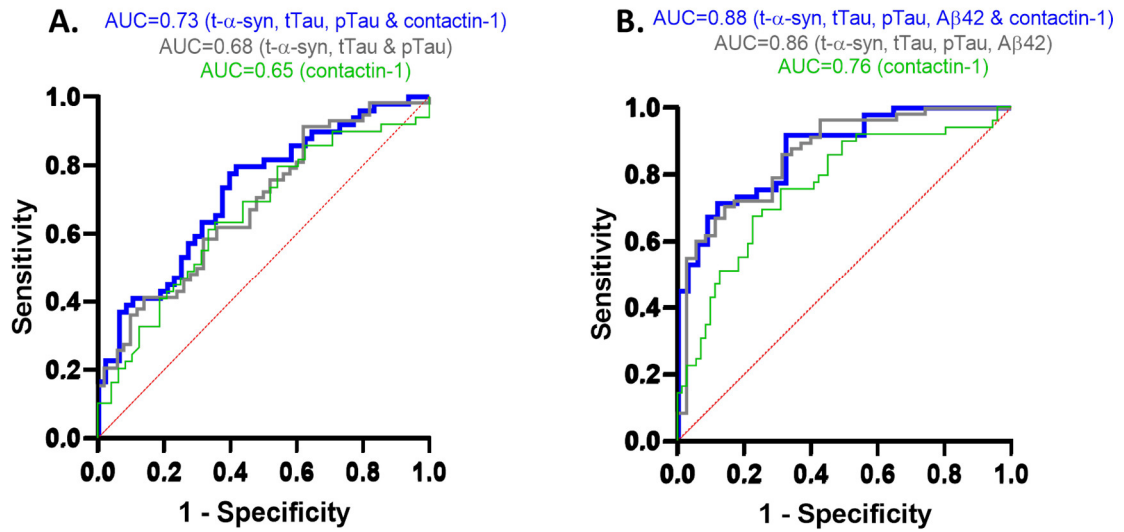

**Figure S1.** Area under receiver-operating characteristic (ROC) curves for discriminating PD from controls (A) and PD from DLB (B).

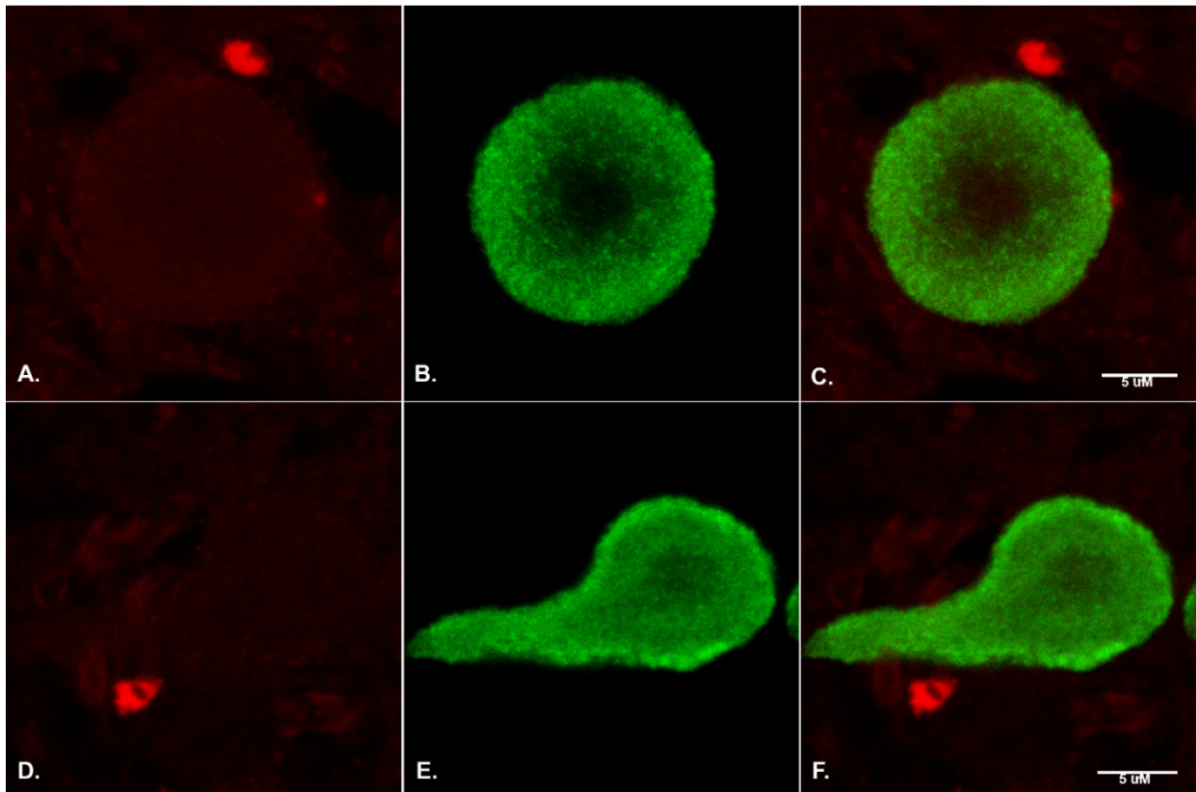

**Figure S2.** Representative photomicrographs of negative controls (substantia nigra (SN)). (A,D) were immunolabelled with only donkey anti-rabbit alexa-594 secondary antibody (contactin primary antibodies were omitted). (B,E) were immunolabelled for p-Ser129-aSyn with subsequent addition of the corresponding secondary antibody; (C,F) shows the merged images of red and green channels. Contactin-1 and contactin-2 specific signals cannot be seen (A,D) in the absence of

contactin primary antibodies, indicating the absence of non-specific signals from the secondary antibody only. Scale bar: 5  $\mu$ M.

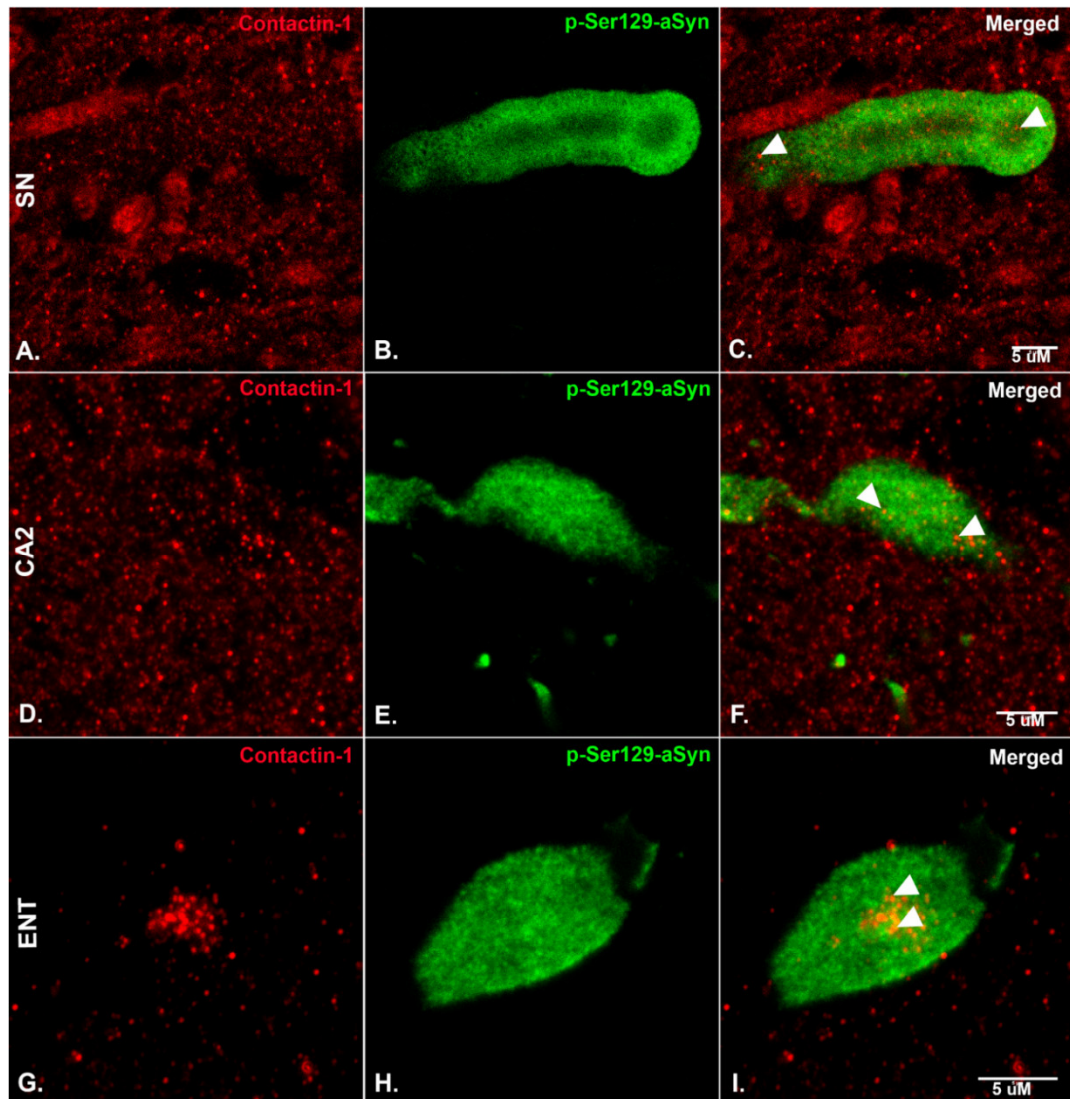

**Figure S3.** Representative photomicrographs of sections immunostained for contactin-1, and p-Ser129-aSyn in the substantia nigra (SN) (A–C), hippocampus CA2 region (D–F) and entorhinal cortex (ENT) (G–I) of post-mortem human PD brain sections. The distribution of contactin-1 was seen throughout the bulgy Lewy neurites, whereas in others the distribution pattern was more clustered.

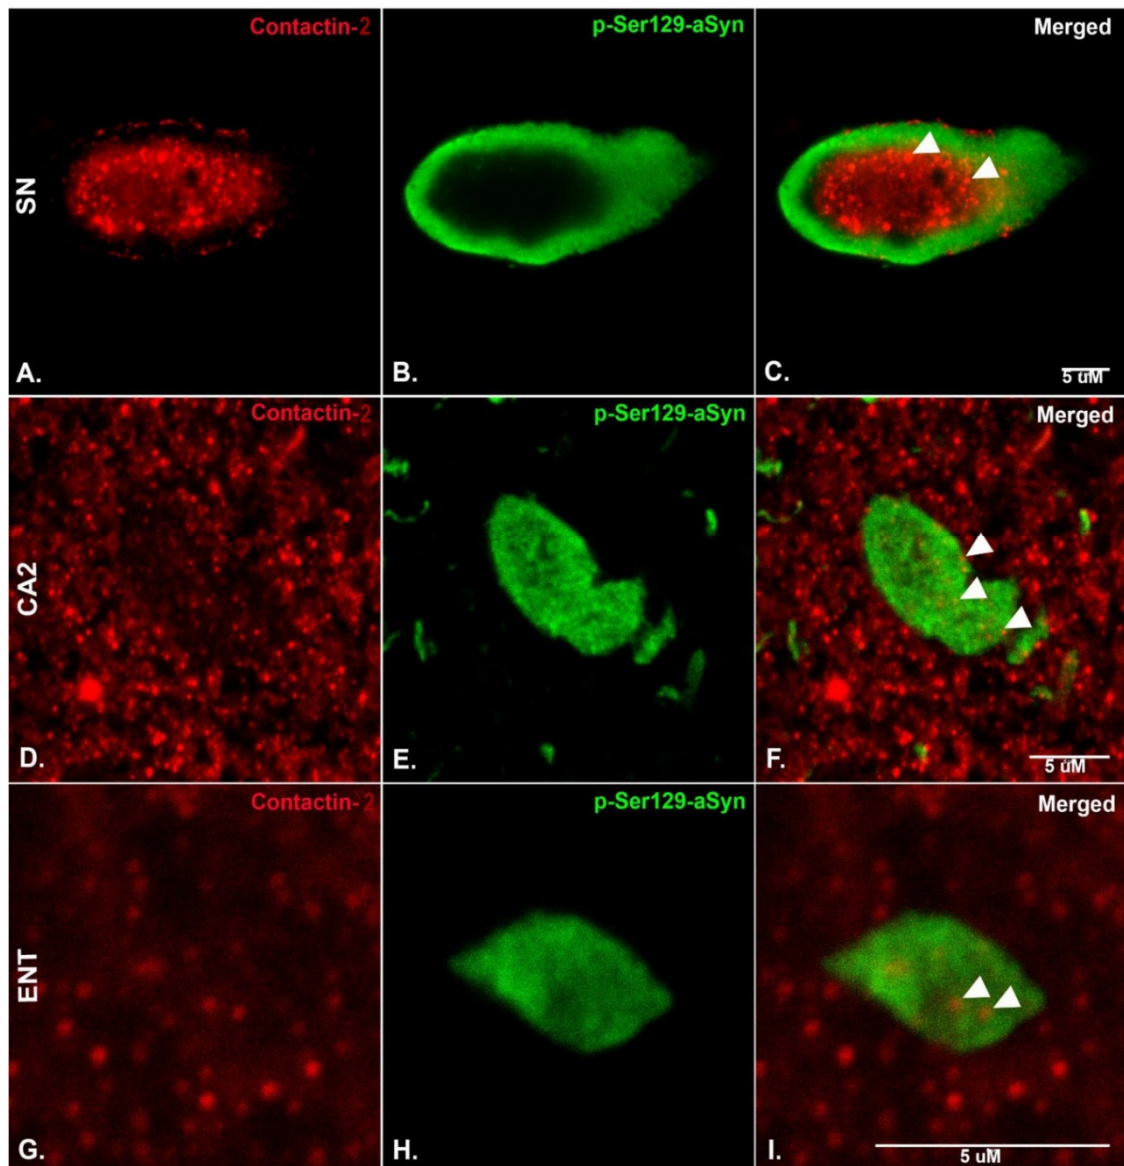

**Figure S4.** Representative photomicrographs of sections immunostained for contactin-2 and p-Ser129-aSyn in the substantia nigra (SN) (A–C), hippocampus CA2 region (D–F) and entorhinal cortex (ENT) (G–I) of post-mortem human PD brain sections. The pattern of contactin-2 expression is different in different types of Lewy neurites.

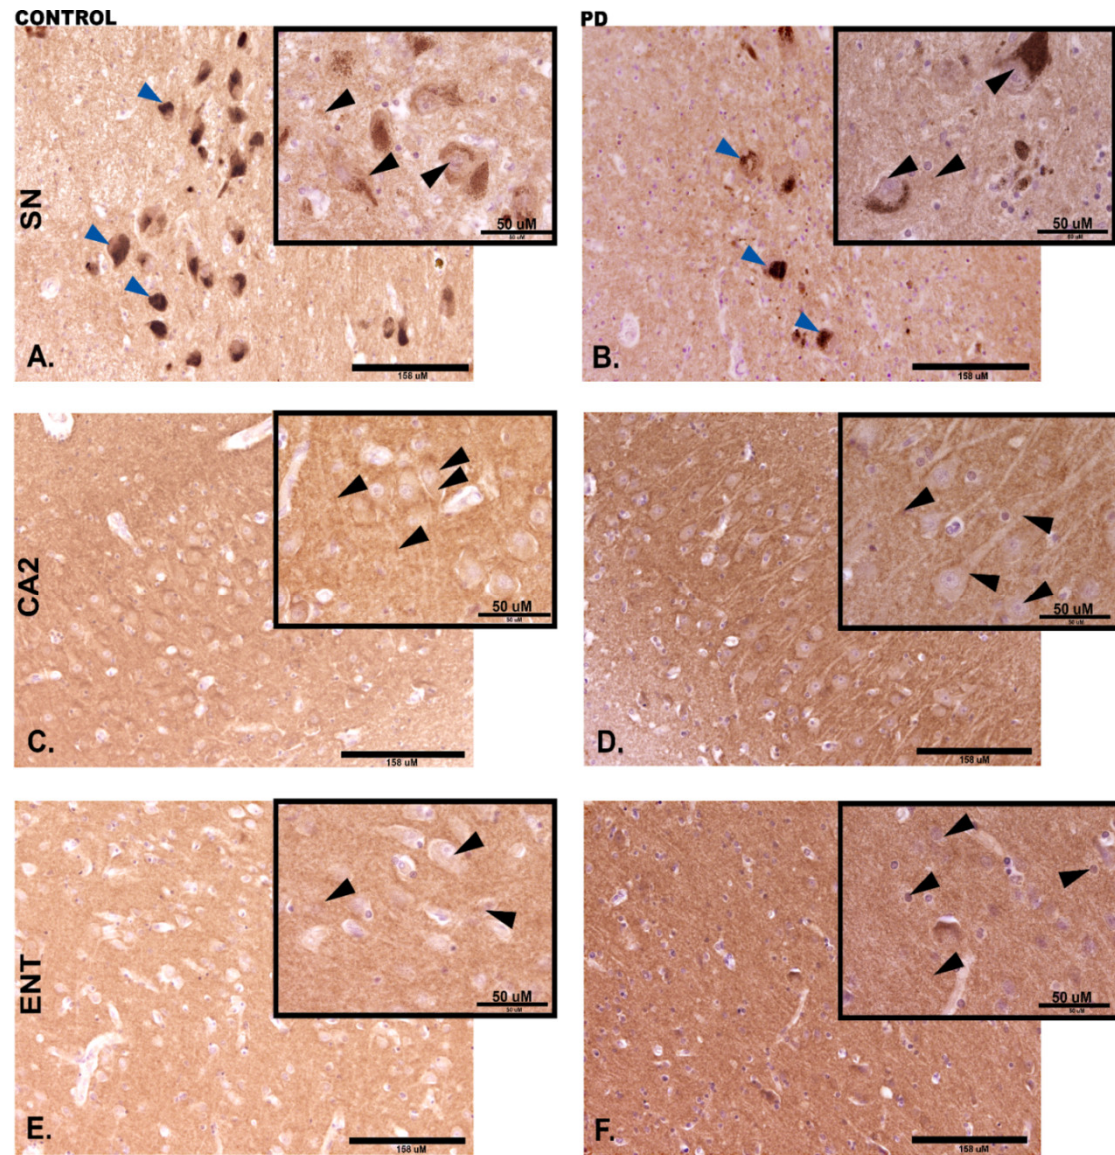

**Figure S5.** Representative photomicrographs of sections immunostained for contactin-1 in the substantia nigra (SN) (**A,B**), hippocampus CA2 region (**C,D**) and entorhinal cortex (ENT) (**E,F**) of post-mortem human control (left panel) and PD (right panel) brain sections. Synaptic-like punctate contactin-1 expression can be seen in the extracellular matrix, cell body, nucleus and axonal processes (shown with black arrowheads). Possible neuromelanin-positive cells in the SN are shown with blue arrowheads.

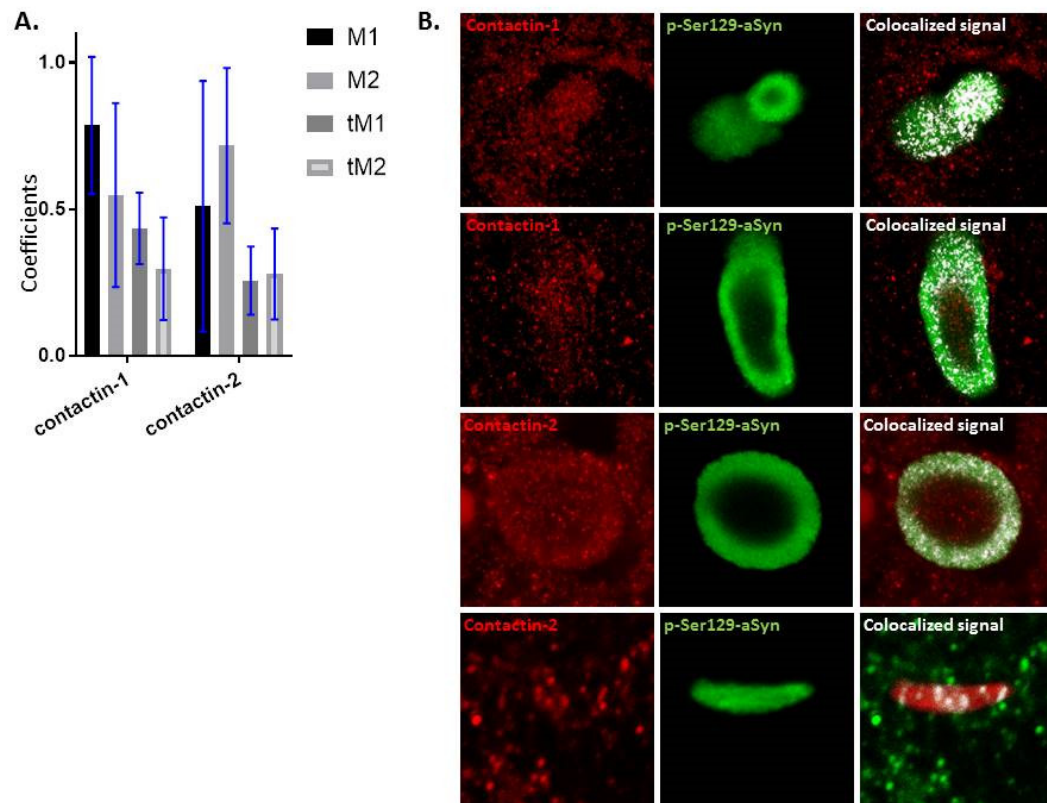

**Figure S6.** (A) Colocalization quantification using ‘colocalization threshold’ plug-in in ImageJ-Fiji. M1, M2 are Mander’s coefficients and tM1, tM2 are thresholded Mander’s coefficients. The bar plots represent mean $\pm$ SD values of Mander’s coefficients for all images quantified ( $n = 6$  images quantified per group). The overall Pearson’s correlation coefficient ranged between 0.1 and 0.4. (B) Representative photomicrographs of sections immunostained for contactin-1 and contactin-2. The rightmost panels show the colocalized signal above the threshold (in white).

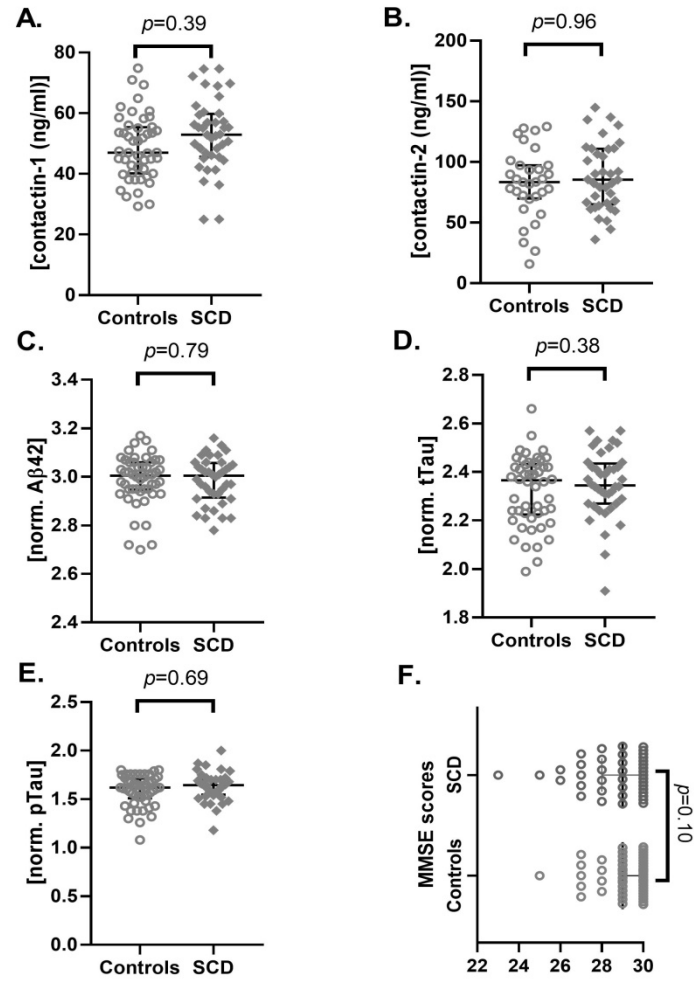

**Figure S7.** Levels of CSF contactin-1 (A), contactin-2 (B), normalized A $\beta$ 42 (C), normalized tTau (D), normalized pTau (E) and MMSE scores (F) in controls and SCD. The long horizontal line represents median and the short horizontal lines represent inter-quartile range (IQR) respectively. The *p*-values displayed are corrected for sex and age. .

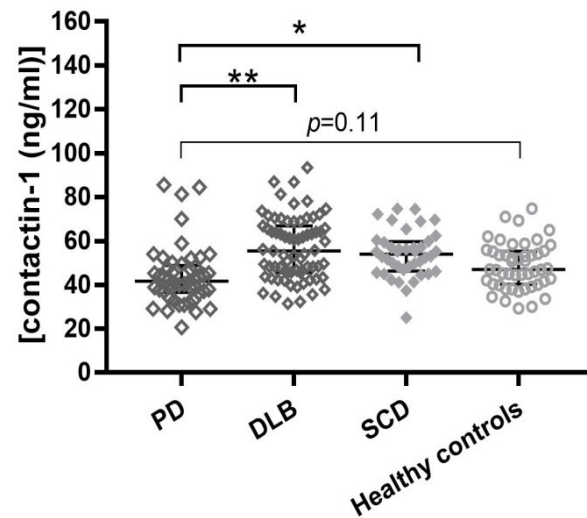

**Figure S8.** Levels of CSF contactin-1 in PD, DLB, SCD and healthy controls. The long horizontal line represents the median and the short horizontal lines represent the inter-quartile range (IQR),

respectively. \*  $p < 0.05$ , \*\*  $p < 0.01$ . The  $p$ -values displayed are corrected for multiple comparisons (Bonferroni correction), sex and age.
